# Supplementary material for: Acute ACAT1/SOAT1 Blockade Increases MAM Cholesterol and Strengthens ER-Mitochondria Connectivity
Source: MDPI journal article supplement (doi:10.3390/ijms24065525), 2023-03-14
Supplement: s1 [file s1]

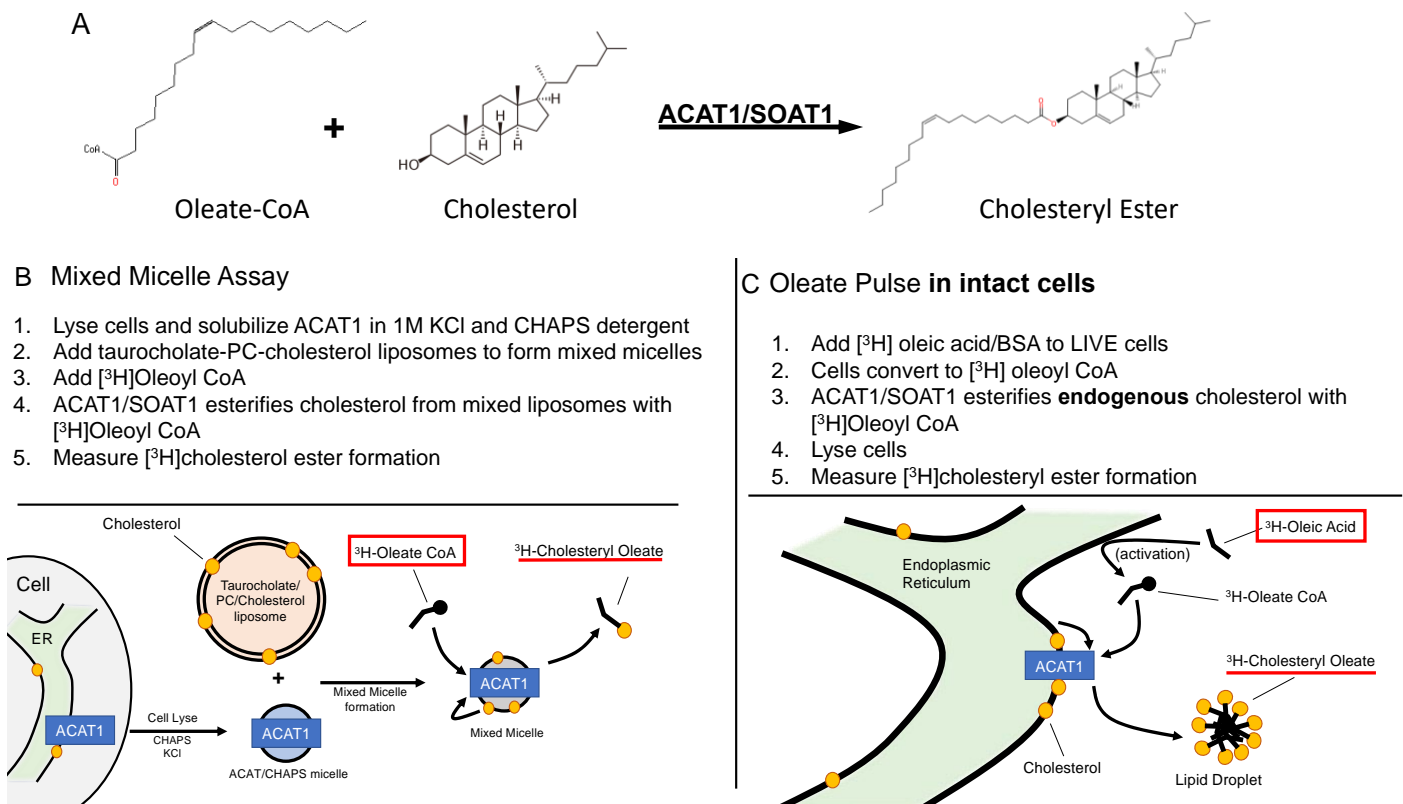

**Figure S1** ACAT1/SOAT1 activity assays. A) Cholesterol esterification reaction catalyzed by ACAT1/SOAT1. B) Mixed micelle assay. ACAT1/SOAT1 from cells is solubilized in 1M KCl and CHAPS detergent to form ACAT1/CHAPS micelles and suspended in solution with taurocholate/phosphatidylcholine/cholesterol liposomes. Reconstituted ACAT1/SOAT1 esterifies excess micellar cholesterol with [ $^3\text{H}$ ]oleate CoA. ACAT1/SOAT1 activity measured by [ $^3\text{H}$ ] cholesteryl-oleate formation. C) [ $^3\text{H}$ ] oleate pulse. [ $^3\text{H}$ ] oleic acid added to live cells and activated with coenzyme A. ACAT1/SOAT1 activity measured by [ $^3\text{H}$ ] cholesteryl-oleate formation. Glycerolipid synthesis measured by [ $^3\text{H}$ ] oleic acid incorporation into other lipid species.

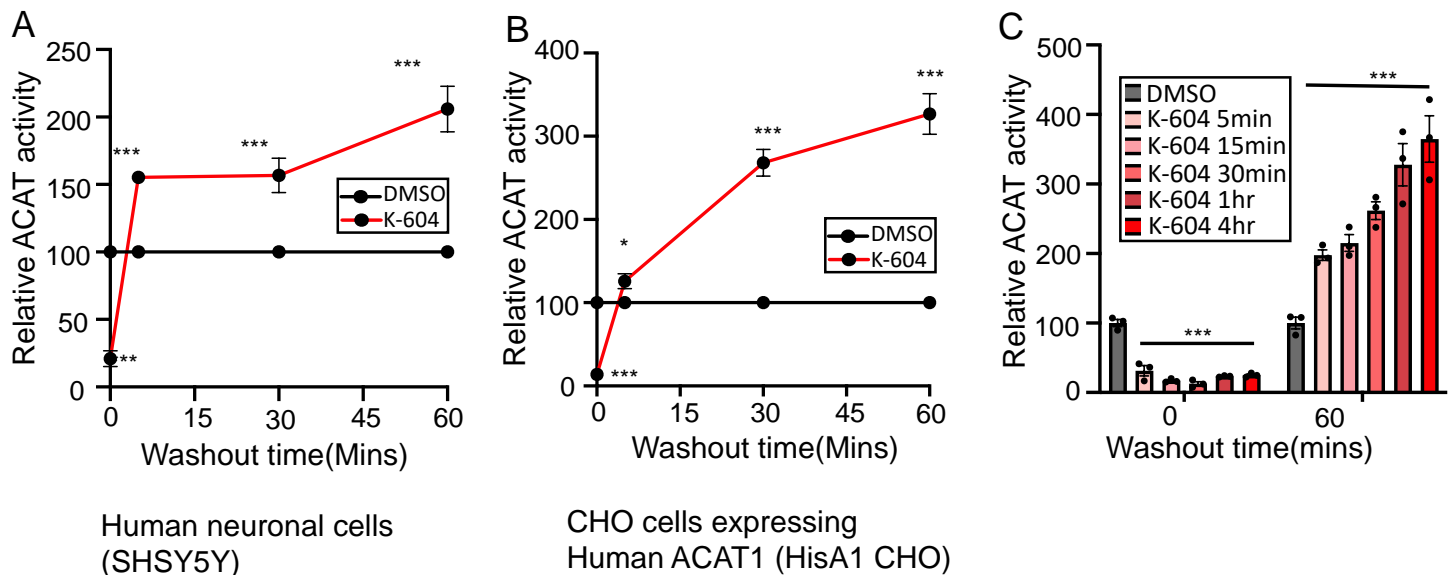

Figure S2 ACAT1/SOAT1 blockade cholesterol pool observation. A) ACAT1/SOAT1 activity as measured by [ $^3\text{H}$ ] Oleate pulse in SHSY5Y cells (immortalized human neuronal cell line). ACAT1 activity spike is seen in cells pre-treated with K-604 and washed with conditioned drug-free media.  $n=6$ . B) ACAT1/SOAT1 activity as measured by [ $^3\text{H}$ ] oleate pulse in hACAT1 CHO cells (CHO cells expressing human ACAT1/SOAT1). ACAT1 activity spike is seen in cells pre-treated with K-604 and washed with conditioned drug-free media.  $n=3$ . C) N9 cells pre-treated with K-604 for varying amounts of time. Cells were washed or not with conditioned drug-free media for 60 minutes before measuring ACAT1/SOAT1 activity with [ $^3\text{H}$ ] oleate pulse.  $n=3$ . Error bars represent SEM. p-value determined using student's t-test; \* $p<0.05$ ; \*\* $p<0.01$ ; \*\*\* $p<0.001$ .

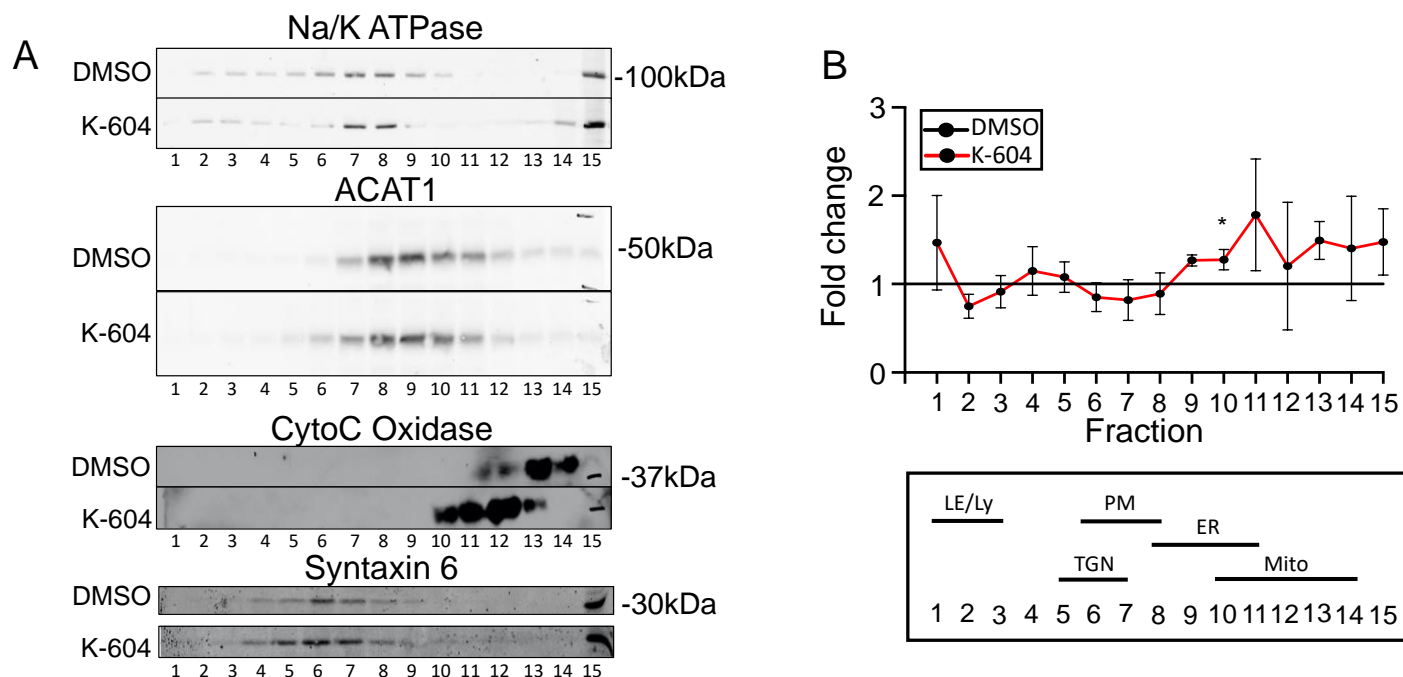

Figure S3 Measuring cholesterol in cellular fractions separated by OptiPrep fractionation. N9 cells were treated with 0.5 $\mu$ M K-604 or DMSO vehicle control for 4 hours before lysing cells and separating components with OptiPrep fractionation. A) representative Western blots showing distribution of plasma membrane (Na/K ATPase), endoplasmic reticulum (ACAT1/SOAT1), mitochondria (cytochrome C Oxidase), and trans golgi apparatus (Syntaxin 6). B) quantification of cholesterol analysis performed for OptiPrep fractions using thin layer chromatography. n=3. Error bars represent SEM. p-value determined using student's t-test; \*p<0.05

| Gene Name    | logFC   | P.Value | UniProt ID                | Description                                                        | Gene Name | logFC    | P.Value | UniProt ID                | Description                                                     |
|--------------|---------|---------|---------------------------|--------------------------------------------------------------------|-----------|----------|---------|---------------------------|-----------------------------------------------------------------|
| Mtx3         | 0.1927  | 0.011   | <a href="#">D3YTP3</a>    | Metaxin                                                            | Vapa      | 0.102083 | 0.4471  | <a href="#">Q9WV55</a>    | Vesicle-associated membrane protein-associated protein A        |
| <b>Soat1</b> | 0.1954  | 0.018   | <a href="#">Q61263</a>    | Sterol O-acyltransferase 1                                         | Zdhhc5    | 0.053328 | 0.46369 | <a href="#">Q8VD24</a>    | Palmitoyltransferase ZDHHC5                                     |
| Exd2         | 0.1987  | 0.021   | <a href="#">Q8VEG4</a>    | Exonuclease 3-5 domain-containing protein 2                        | Mief1     | 0.065607 | 0.47951 | <a href="#">Q8BGV8</a>    | Mitochondrial dynamics protein MID51                            |
| Maco1        | 0.2272  | 0.029   | <a href="#">Q7TQ66</a>    | Macoilin                                                           | Ubxn4     | 0.079242 | 0.49984 | <a href="#">A0A0R4J07</a> | UBX domain-containing protein 4                                 |
| Nap114       | -0.1886 | 0.032   | <a href="#">B7ZNL2</a>    | Nap114 protein                                                     | Stx5a     | 0.059767 | 0.50269 | <a href="#">H3BJ02</a>    | Syntaxin 5A                                                     |
| Elovl1       | -0.1873 | 0.034   | <a href="#">Q9LIJ5</a>    | Elongation of very long chain fatty acids protein 1                | Pkd2      | 0.061474 | 0.5203  | <a href="#">Q35245</a>    | Polycystin-2                                                    |
| Bet1         | -0.2925 | 0.045   | <a href="#">Q35623</a>    | BET1 homolog                                                       | Pthr2     | 0.051374 | 0.53003 | <a href="#">Q8R2Y8</a>    | Peptidyl-tRNA hydrolase 2, mitochondrial                        |
| Dnajc14      | 0.1596  | 0.049   | <a href="#">Q921R4</a>    | DnaJ homolog subfamily C member 14                                 | Chp1      | 0.042547 | 0.53279 | <a href="#">P61022</a>    | Calcineurin B homologous protein 1                              |
| Tmpo         | -0.3428 | 0.051   | <a href="#">Q61029</a>    | Lamina-associated polypeptide 2, isoforms beta/delta/epsilon/gamma | Slc27a4   | 0.041058 | 0.53443 | <a href="#">Q91VE0</a>    | Long-chain fatty acid transport protein 4                       |
| Bax          | -0.2027 | 0.057   | <a href="#">A0A1B0GT1</a> | Apoptosis regulator BAX                                            | Camlg     | -0.06527 | 0.53497 | <a href="#">P49070</a>    | Guided entry of tail-anchored proteins factor CAMLG             |
| Sar1a        | -0.2174 | 0.063   | <a href="#">Q99J24</a>    | GTP-binding protein SAR1a                                          | Itgb1     | -0.05067 | 0.55277 | <a href="#">P09055</a>    | Integrin beta-1                                                 |
| Ykt6         | -0.1828 | 0.064   | <a href="#">Q9CQW1</a>    | Synaptobrevin homolog YKT6                                         | Vezt      | 0.047093 | 0.56229 | <a href="#">D3Z4E6</a>    | Vezatin                                                         |
| Cdk5rap3     | 0.2752  | 0.068   | <a href="#">Q99LM2</a>    | CDK5 regulatory subunit-associated protein 3                       | Rhot2     | 0.05142  | 0.56758 | <a href="#">Q8JZN7</a>    | Mitochondrial Rho GTPase 2                                      |
| Armcx3       | 0.1394  | 0.07    | <a href="#">Q8BH56</a>    | Armado repeat-containing X-linked protein 3                        | Lrrc59    | -0.04798 | 0.5681  | <a href="#">Q822Q8</a>    | Leucine-rich repeat-containing protein 59                       |
| Gdap11       | -0.1341 | 0.078   | <a href="#">A2A5H8</a>    | Ganglioside-induced differentiation-associated protein 1-like 1    | Tmem9b    | 0.041893 | 0.56911 | <a href="#">Q9JIR8</a>    | Transmembrane protein 9B                                        |
| Mrps7        | 0.2085  | 0.095   | <a href="#">Q8QX85</a>    | 28S ribosomal protein S7, mitochondrial                            | Sec61b    | -0.05387 | 0.57486 | <a href="#">Q9CQ58</a>    | Protein transport protein Sec61 subunit beta                    |
| Kcap4        | -0.1534 | 0.101   | <a href="#">Q8BMK4</a>    | Cytoskeleton-associated protein 4                                  | Dhcr7     | 0.07808  | 0.57678 | <a href="#">A0A140LIT</a> | 7-dehydrocholesterol reductase                                  |
| C1qbp        | 0.1967  | 0.108   | <a href="#">Q8RS11</a>    | Complement component 1 Q subcomponent-binding protein              | Srprb     | 0.040228 | 0.59727 | <a href="#">P47758</a>    | Signal recognition particle receptor subunit beta               |
| Lem3         | -0.1456 | 0.115   | <a href="#">E9QPS9</a>    | Inner nuclear membrane protein Man1                                | Pdia6     | -0.06395 | 0.62205 | <a href="#">Q922R8</a>    | Protein disulfide-isomerase A6                                  |
| Myo19        | 0.143   | 0.117   | <a href="#">Q5SV80</a>    | Unconventional myosin-XIX                                          | Ddrgk1    | 0.05077  | 0.62891 | <a href="#">Q80WW9</a>    | DDRKG domain-containing protein 1                               |
| Mtfr1        | 0.1528  | 0.126   | <a href="#">Q9CQW0</a>    | Mitochondrial fission regulator 1-like                             | Pgrmc1    | 0.048194 | 0.63992 | <a href="#">Q55022</a>    | Membrane-associated progesterone receptor component 1           |
| Ephx1        | -0.1512 | 0.142   | <a href="#">Q9D379</a>    | Epoxide hydrolase 1                                                | Mavs      | -0.06122 | 0.64171 | <a href="#">Q8VCF0</a>    | Mitochondrial antiviral-signaling protein                       |
| Fkbp8        | 0.156   | 0.146   | <a href="#">Q35465</a>    | Peptidyl-prolyl cis-trans isomerase FKBP8                          | Erlin2    | -0.03081 | 0.66071 | <a href="#">Q8BF29</a>    | Erlin-2                                                         |
| Spcs2        | -0.1105 | 0.158   | <a href="#">A0A140LJ0</a> | Signal peptidase complex subunit 2 (Fragment)                      | Acbd5     | 0.031634 | 0.67527 | <a href="#">E9QNH7</a>    | Acyl-CoA-binding domain-containing protein 5                    |
| Jund         | -0.3013 | 0.159   | <a href="#">P15066</a>    | Transcription factor JunD                                          | Emd       | 0.037047 | 0.69371 | <a href="#">I7HJ51</a>    | Emerin                                                          |
| Sc5d         | 0.1894  | 0.162   | <a href="#">Q88822</a>    | Lathosterol oxidase                                                | Ociad1    | 0.027402 | 0.69749 | <a href="#">Q9CRD0</a>    | OClA domain-containing protein 1                                |
| Lbr          | -0.2153 | 0.168   | <a href="#">Q3U9G9</a>    | Delta(14)-sterol reductase LBR                                     | Vkorc11   | 0.038791 | 0.70187 | <a href="#">Q6TEK5</a>    | Vitamin K epoxide reductase complex subunit 1-like protein 1    |
| Sar1b        | -0.1287 | 0.177   | <a href="#">Q9CQC9</a>    | GTP-binding protein SAR1b                                          | Cisd2     | -0.02589 | 0.70347 | <a href="#">Q9CQ85</a>    | CDGSH iron-sulfur domain-containing protein 2                   |
| Pcca         | 0.1669  | 0.186   | <a href="#">Q91Z43</a>    | Propionyl-CoA carboxylase alpha chain, mitochondrial               | Emc7      | -0.02619 | 0.707   | <a href="#">Q9EP72</a>    | ER membrane protein complex subunit 7                           |
| Alg9         | -0.0933 | 0.195   | <a href="#">Q8VDJ9</a>    | Alpha-1,2-mannosyltransferase ALG9                                 | Erlin1    | -0.02532 | 0.7291  | <a href="#">Q91X78</a>    | Erlin-1                                                         |
| Rft1         | 0.11    | 0.207   | <a href="#">Q8C388</a>    | Protein RFT1 homolog                                               | Vma21     | -0.02658 | 0.73464 | <a href="#">Q78T54</a>    | Vacuolar ATPase assembly integral membrane protein Vma21        |
| Cyb5r3       | -0.0948 | 0.216   | <a href="#">Q9DCN2</a>    | NADH-cytochrome b5 reductase 3                                     | Mif2      | -0.02245 | 0.7518  | <a href="#">Q99KX1</a>    | Myeloid leukemia factor 2                                       |
| Rab29        | 0.1148  | 0.216   | <a href="#">Q91Y01</a>    | Ras-related protein Rab-7L1                                        | Tex264    | -0.02589 | 0.76034 | <a href="#">E9Q137</a>    | Testis-expressed protein 264 homolog                            |
| Dnajc11      | 0.1126  | 0.221   | <a href="#">Q5U458</a>    | DnaJ homolog subfamily C member 11                                 | Atp6ap2   | 0.024313 | 0.76287 | <a href="#">Q9CYN9</a>    | Renin receptor                                                  |
| Praf2        | -0.0986 | 0.224   | <a href="#">Q91IG8</a>    | PRA1 family protein 2                                              | Srnm12    | 0.027544 | 0.76714 | <a href="#">Q78RX3</a>    | Small integral membrane protein 12                              |
| Pigu         | 0.1113  | 0.225   | <a href="#">Q3TA48</a>    | Phosphatidylinositol glycan anchor biosynthesis class U protein    | Faf2      | -0.02022 | 0.7674  | <a href="#">Q3TDN2</a>    | FAS-associated factor 2                                         |
| Agpat1       | 0.1009  | 0.227   | <a href="#">A0A0R4J26</a> | 1-acyl-sn-glycerol-3-phosphate acyltransferase                     | Mmgt1     | 0.022617 | 0.78859 | <a href="#">Q8K273</a>    | ER membrane protein complex subunit 5                           |
| Atp2a2       | 0.1085  | 0.232   | <a href="#">Q55143</a>    | Sarcoplasmic/endoplasmic reticulum calcium ATPase 2                | Dhrs7b    | 0.016804 | 0.79354 | <a href="#">Z4YK16</a>    | Dehydrogenase/reductase SDR family member 7B                    |
| Fundc2       | 0.085   | 0.264   | <a href="#">Q9D6K8</a>    | FUN14 domain-containing protein 2                                  | Sec63     | 0.01683  | 0.81793 | <a href="#">Q8VHE0</a>    | Translocation protein SEC63 homolog                             |
| Hmox2        | -0.0789 | 0.265   | <a href="#">Q70252</a>    | Heme oxygenase 2                                                   | Stt3b     | -0.01708 | 0.83568 | <a href="#">A0A0R4J07</a> | Dolichyl-diphosphooligosaccharide-protein glycotransferase      |
| Pex14        | -0.0855 | 0.267   | <a href="#">Q9R0A0</a>    | Peroxisomal membrane protein PEX14                                 | Vapb      | -0.0244  | 0.83767 | <a href="#">Q8BH80</a>    | Vesicle-associated membrane protein, associated protein B and C |
| Ube2j1       | 0.1358  | 0.276   | <a href="#">Q91J24</a>    | Ubiquitin-conjugating enzyme E2 J1                                 | Aldh3a2   | 0.01015  | 0.88328 | <a href="#">B1AV77</a>    | Aldehyde dehydrogenase                                          |
| Ubxn8        | -0.2942 | 0.276   | <a href="#">Q3TIF2</a>    | UBX domain-containing protein 8                                    | Rab1A     | 0.01746  | 0.88415 | <a href="#">P62821</a>    | Ras-related protein Rab-1A                                      |
| Bcap31       | -0.0923 | 0.278   | <a href="#">Q61335</a>    | B-cell receptor-associated protein 31                              | Tmem214   | 0.009196 | 0.90629 | <a href="#">D3Z6S1</a>    | Transmembrane protein 214                                       |
| Tmem209      | -0.0997 | 0.295   | <a href="#">Q8BRG8</a>    | Transmembrane protein 209                                          | Akap13    | 0.011075 | 0.90662 | <a href="#">E9Q394</a>    | A-kinase anchor protein 13                                      |
| Tmx1         | -0.0819 | 0.304   | <a href="#">Q8VB70</a>    | Thioredoxin-related transmembrane protein 1                        | Ln timer  | -0.0086  | 0.90883 | <a href="#">Q7TQ95</a>    | Endoplasmic reticulum junction formation protein lunapark       |
| Pgrmc2       | -0.0736 | 0.326   | <a href="#">Q80UJ9</a>    | Membrane-associated progesterone receptor component 2              | Tmem230   | -0.01252 | 0.91239 | <a href="#">Q8C186</a>    | Transmembrane protein 230                                       |
| Tdrkh        | 0.113   | 0.344   | <a href="#">A0A0G2J60</a> | Tudor and KH domain-containing protein                             | Gpat4     | -0.00918 | 0.91849 | <a href="#">Q8K2C8</a>    | Glycerol-3-phosphate acyltransferase 4                          |
| Reep5        | -0.074  | 0.349   | <a href="#">G3X8R0</a>    | Receptor expression-enhancing protein                              | Cisd1     | -0.00836 | 0.92439 | <a href="#">Q91WS0</a>    | CDGSH iron-sulfur domain-containing protein 1                   |
| Ormd12       | 0.0731  | 0.353   | <a href="#">Q9CQZ0</a>    | ORM1-like protein 2                                                | Emc6      | 0.009607 | 0.93976 | <a href="#">Q9CQW0</a>    | ER membrane protein complex subunit 6                           |
| Atg2a        | 0.2378  | 0.388   | <a href="#">F6V3Y9</a>    | Autophagy-related protein 2 homolog A (Fragment)                   | Tmem201   | 0.007202 | 0.94059 | <a href="#">A2A8U2</a>    | Transmembrane protein 201                                       |
| Tomm5        | 0.0756  | 0.396   | <a href="#">B1AXP6</a>    | Mitochondrial import receptor subunit TOM5 homolog                 | Abcd3     | -0.00503 | 0.94599 | <a href="#">P55096</a>    | ATP-binding cassette sub-family D member 3                      |
| Rab13        | 0.0569  | 0.4     | <a href="#">Q9D4V7</a>    | Rab-like protein 3                                                 | Usp30     | -0.00526 | 0.94789 | <a href="#">Q3UN04</a>    | Ubiquitin carboxyl-terminal hydrolase 30                        |
| Tmem199      | -0.0741 | 0.403   | <a href="#">Q55YH2</a>    | Transmembrane protein 199                                          | Tomm20    | 0.005444 | 0.94907 | <a href="#">Q9DCC8</a>    | Mitochondrial import receptor subunit TOM20 homolog             |
| Ssr1         | -0.0555 | 0.405   | <a href="#">Q9CY50</a>    | Translocon-associated protein subunit alpha                        | Use1      | -0.00556 | 0.95185 | <a href="#">Q9CQ56</a>    | Vesicle transport protein USE1                                  |
| Scd2         | 0.1247  | 0.407   | <a href="#">A0A4948A</a>  | Stearoyl-CoA desaturase 2                                          | Dgke      | -0.00335 | 0.96596 | <a href="#">Q9R1C6</a>    | Diacylglycerol kinase epsilon                                   |
| Rap2c        | 0.0634  | 0.411   | <a href="#">Q8BU31</a>    | Ras-related protein Rap-2c                                         | C2cd2l    | -0.0024  | 0.97951 | <a href="#">Q8QX80</a>    | Phospholipid transfer protein C2CD2L                            |
| Tbl2         | 0.0568  | 0.413   | <a href="#">Q9R099</a>    | Transducin beta-like protein 2                                     | Sec22b    | 0.001428 | 0.98666 | <a href="#">Q08547</a>    | Vesicle-trafficking protein SEC22b                              |
| Lpgat1       | 0.06    | 0.421   | <a href="#">E9QL80</a>    | Acyl-CoA:lysophosphatidylglycerol acyltransferase 1                | Dnm1l     | 0.000872 | 0.99281 | <a href="#">E9PUD2</a>    | Dynamin-1-like protein                                          |
| Tor1aip1     | -0.0584 | 0.437   | <a href="#">E9PWV2</a>    | Torsin-1A-interacting protein 1                                    | Rnf5      | -0.00079 | 0.99327 | <a href="#">Q35445</a>    | E3 ubiquitin-protein ligase RNF5                                |
| Tmem109      | -0.0487 | 0.446   | <a href="#">D3Z018</a>    | Transmembrane protein 109 (Fragment)                               | Abca3     | -0.00047 | 0.9954  | <a href="#">Q8R420</a>    | Phospholipid-transporting ATPase ABCA3                          |

Figure S4 MAM proteins identified in proteomic analysis. N9 cells were treated with 0.5µM K-604 or DMSO vehicle for 4 hours before subject to MAM fractionation. MAM fractions were analyzed by protein mass spec. this table displays the fold change (K-604 vs vehicle) and p-values of MAM proteins identified in Kwak et al. [108]
